# Supplementary material
Source: PubMed Central journal article supplement (PMC3784521)
Supplement: JCI64216sd.pdf [file JCI64216sd.pdf]

## **SUPPLEMENTAL MATERIAL**

### **Materials and Methods**

***Recombinant Adenoviral Expression Constructs:*** Viral constructs which express lacZ,  $\beta$ 1A integrin and  $\beta$ 1D integrin were as reported previously (1, 2). Adenovirus expressing full-length rat  $\alpha$ 7BX2 integrin under control of the CMV promoter was produced in the AdEasy system (Agilent). Adenovirus producing  $\alpha$ 5 integrin was kindly supplied by Drs. Clayton Buck (The Wistar Institute) and Lou Terracio (NYU School of Dentistry) (3).

***Immunoblot analysis:*** Proteins extracted from isolated cardiomyocytes were subjected to Western blotting as described previously (4). Primary antibodies used are as listed below. Protein expression levels were evaluated with Image Lab software (MCM Design) based on the signal intensity of each protein using GAPDH as an internal control for protein loading. The amount of  $\beta$ 1A integrin that co-immunoprecipitated with RyR2 was determined from immunoblots probed with an anti- $\beta$ 1D integrin antibody. Levels of RyR2-bound proteins were normalized to the total RyR2 immunoprecipitated.

***Immunofluorescent Microscopy:*** Cells were fixed with ice-cold acetone followed by blocking and permeabilization with 2% BSA and 1% Triton X-100 in PBS, and then incubated with antibodies. Primary antibodies used and their dilutions are:  $\beta$ 1D integrin (2) (1:1000),  $\alpha$ 5 integrin (5) (kindly supplied

by Dr. M. Valencik, U. Nevada) (1:1000),  $\alpha 7$  integrin (6) (1:1000), JP-2 (1:100; Santa-Cruz; sc-51313), RyR2 (1:100; Sigma-Aldrich; 2554), WGA Alexa Fluor 488 conjugate (1:100; Invitrogen; W11261). The target proteins were visualized with the secondary antibodies (Alexa Fluor 488 and 568, 1:500; Invitrogen) and Hoechst nuclear stain. Fluorescence images were obtained using a Zeiss AxioObserver microscope and analyzed with Axiovision software. Colocalization was evaluated by Pearson correlation statistical analysis with Volocity 3D Image Analysis Software (Perkin Elmer).

***Antibodies used for immunoblotting:***  $\beta 1D$  integrin (2),  $\alpha 5$  integrin (Chemicon; AB1928),  $\alpha 7$  integrin (B2 347 B15) (6), PyK2 (Upstate; 06-559), phospho-PyK2 (Biosource; 44-618G), FAK (Biosource; 44-624G), phospho-FAK (Biosource; 44-652G), ILK (Upstate; 05-575), Akt (Cell Signaling; 9272), phospho-Akt (Cell Signaling; 4058S), p38 (Cell Signaling; 9212), phospho-p38 (Cell Signaling; 9251S), Src (Cell Signaling; 2108), phospho-Src (Cell Signaling; 2105S), GAPDH (Santa-Cruz; sc-32233), iNOS (BD Transduction Labs; 610431), 12-LO (Cayman Chemical; 160304), EC-SOD (Upstate; 07-704), Cu/Zn-SOD (Stressgen; SOD-100), Mn-SOD (Stressgen; SOD-110), Cox2 (Santa-Cruz; sc-1747), NCX-1 (Abcam; ab6495-100), SERCA2a (Affinity Bio-Reagents; MA3-910), PLB (Affinity Bioreagents; MA3-922), phospho-PLB (Badrilla; A010-12), RyR2 (Sigma-Aldrich; 2554), phospho-RyR2 2808 (Badrilla; A010-30), phospho-RyR2 2814 (Badrilla; A010-31), LTCC (Abcam; ab2864-100).

**Immunoelectron Microscopy:** Samples were fixed in 4% paraformaldehyde in 1x PBS buffer (pH 7.4) for 20 minutes at room temperature. After placing them in blocking buffer (1x PBS plus 1% BSA, 3% normal goat serum, 0.1% - 0.2% Triton and 1% fish gelatin and 20 mM glycine) for 30min on ice, they were incubated in primary antibodies ( $\beta$ 1D integrin (2); 1:1000 and RyR2; 1:1000 Sigma-Aldrich) in working buffer (10-fold dilution of blocking buffer in 1x PBS) overnight at 4°C. Then, 6 and 10 nm gold-conjugated secondary antibodies (Electron Microscopy Sciences) diluted in working buffer, were applied to these samples for 4 hours at 4°C, followed by post-fixing in 1% OsO<sub>4</sub> (osmium tetroxide) + 0.8% potassium ferrocyanide in 0.1 M cacodylate buffer for 60min on ice. After polymerization at 60°C for 48h, sections (70 to 80 nm) were stained with lead citrate, and electron micrographs were recorded by using an electron microscope (1200EX; JEOL) operated at 80 kV.

**Cell transfection:** Full length human  $\beta$ 1D integrin cDNA was cloned into pcDNA3.1. Then, the RyR2 plasmids were used to transfect human embryonic kidney (HEK) 293 cells along with  $\beta$ 1D integrin plasmids, using Lipofectamine 2000 (Invitrogen). Following a 48h incubation, protein was isolated from these cells.

**Generation of stable cell lines:** Cells ( $5 \times 10^5$ /well) were seeded on 24-well plates without antibiotics and cultured overnight. The next day, 0.8  $\mu$ g of pcDNA3.1 and pcDNA-human  $\beta$ 1D integrin (1-2412 bp)

plasmid were transfected into HEK293 cells using 2  $\mu$ l of Lipofectamine 2000 (Invitrogen) in OptiMEM Reduced Serum Medium following the manufacturer's instructions. Transfected cells were selected with G418 at 800  $\mu$ g/ml for 4 weeks, and the expression of  $\beta$ 1D integrin protein in selected cell clones was determined by Western blotting.

***Superoxide Anion Quantitation:*** Superoxide anions indicative of reactive oxygen species (ROS) were quantified using the dihydroethidium (HE, Sigma-Aldrich), which is freely permeable to cells and, once oxidized to ethidium, remains trapped inside cells by DNA intercalation. After hypoxia, ARVMs were washed with PBS and incubated in PBS containing 10  $\mu$ M HE at 37°C for 45 minutes in the dark during reperfusion. Excess HE was removed by washing with PBS, and the oxidized product was detected using fluorescence (510-560 nm) microscopy. For fluorescence quantification, analyses of digital images were performed using ImageJ software. Single cell fluorescence was determined after correction for background intensity using cell-free fields of the same image.

***Peptide arrays study:*** Peptide arrays were synthesized on nitrocellulose membranes using SPOT technology as previously described (7-9). Peptides 15 residues in length with a 2 residue skip were synthesized on the membrane, based on the region of RyR2 from 89 AA to 223 AA. The synthesis scale was roughly 30 nmol. Peptide arrays were immersed in ethanol for 1 min and pre-incubated with T-PBS

blocking buffer (PBS pH 7.4, 0.2% Tween 20, 3% BSA) for 1 h. After washing 3 times for 10min with PBS-T, the array was incubated in mouse heart protein lysate solution (1% Triton-X100, 150mM NaCl, 50mM HEPES pH 7.4, 1mM EDTA, 2mM DTT, Protease inhibitor cocktail - Roche) at a concentration of 0.8 mg/mL overnight at a temperature of 4°C. After that, the array was washed 3x each for 10 min with PBS-T and then a  $\beta$ 1D antibody (2) (1:2000) was incubated on the array in blocking buffer for 1h at room temperature. The array was washed again 3 x 10 min with PBS-T at room temperature, incubated for 1h with the secondary antibody (1:10,000), followed by 3 additional 10 min washes in PBS-T buffer at room temperature. Detection was then performed using Lumigen TMA-6 (Lumigen Inc.).

***FRET measurements:*** The cDNA construct RyR2<sub>S437-YFP/S2367-CFP</sub> is an intramolecular FRET sensor (YFP/CFP) that allows detection of interaction between the N-terminal and central regions of the RyR2 protein. It allows for study of stability of this protein and has been validated previously (10). HEK293 cells grown in 35-mm glass bottom culture dishes were maintained in Dulbecco's modified Eagle's for 24 hours. After subculture they were transfected with the RyR2S437-YFP/S2367-CFP plasmid alone, or this plasmid co-transfected with expression plasmids for  $\alpha$ 7,  $\beta$ 1A or  $\beta$ 1D integrin (molar ratio1:1), using Lipofectamine 2000 (Invitrogen). Transfected cells were continued in culture for an additional 24-48 hours, washed three times and examined on a Nikon TE300 inverted microscope equipped with a Dual-view image splitter (BioImaging Solutions Inc.) using a 63X/1.4 NA oil-immersion objective lens. During

examination, cells were kept at 37°C using a water-heated stage incubator. Simultaneous YFP/CFP images were captured under CFP excitation using a Dual-view image splitting filter system equipped with CFP and YFP excitation filters. MATLAB was then used to obtain average pixel intensity of defined regions of interest drawn by blinded operator. Average YFP/CFP intensity ratios were then calculated for each ROI.

**SUPPLEMENTAL FIGURES**

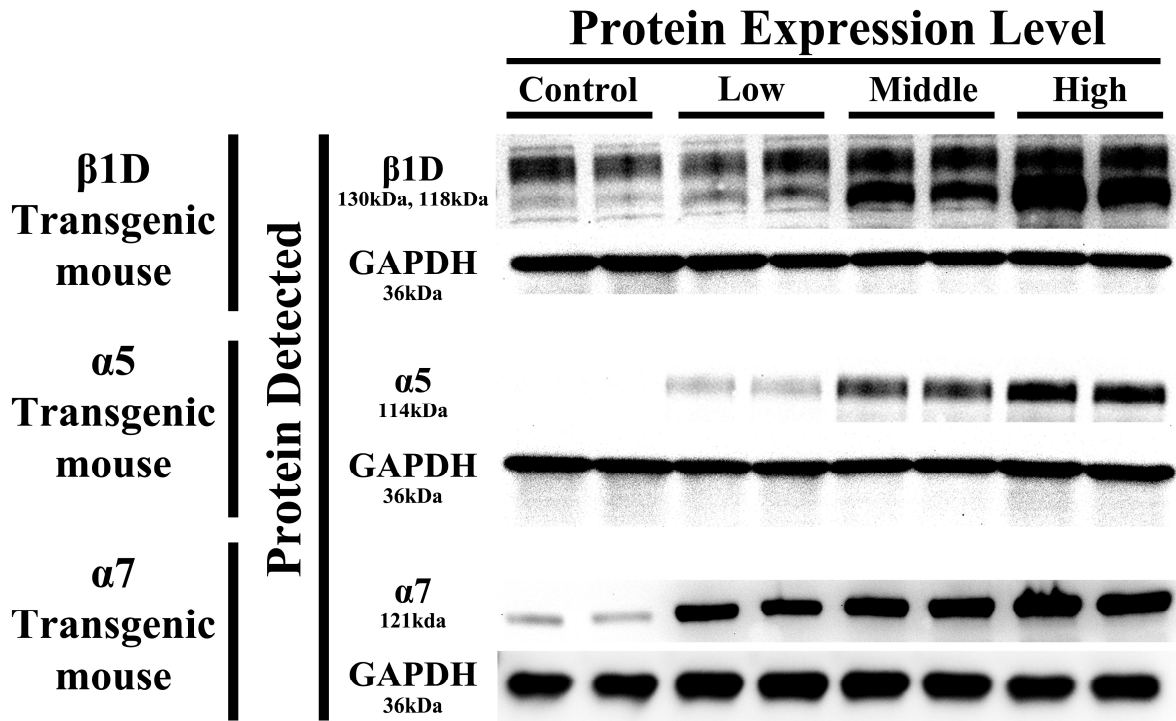

**Figure S1: Representative western blot analyses of integrin expression levels in the cardiac myocyte-specific  $\alpha$ 5,  $\alpha$ 7 and  $\beta$ 1D integrin transgenic mice.** Expression in several lines is shown with varied levels of protein expression indicated as “high, middle and low.” respectively.

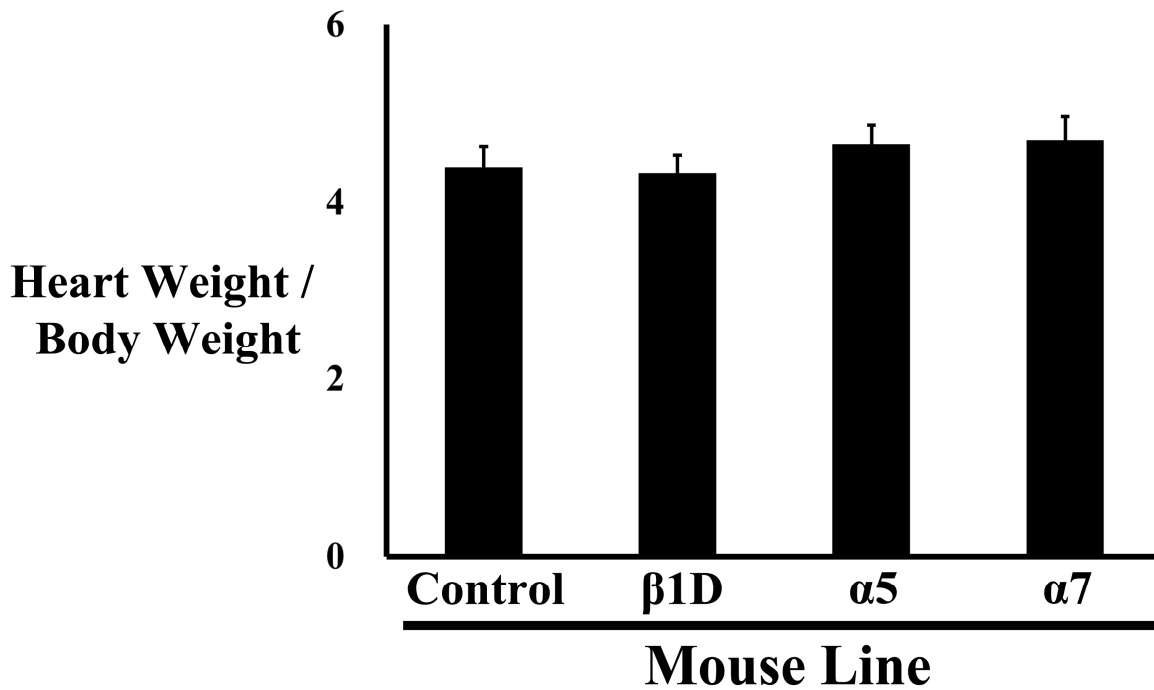

**Figure S2: Morphological Analyses of Cardiomyocyte-specific, single subunit integrin transgenic mouse hearts.** There was no significant difference in morphometry between controls and any of the single integrin subunit transgenic mice. Also, there were no significant histological differences noted between the specimens obtained from the various groups (Data not shown).



## Apoptotic Marker; Presence of membrane phosphatidylserine

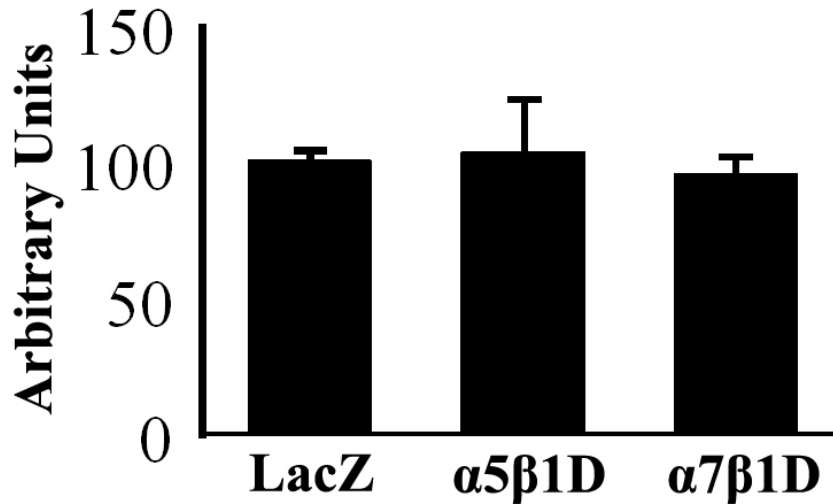

**FIGURE S3 – Assessment of apoptosis in cardiomyocytes shows no difference between groups.** A membrane phosphatidylserine dye-uptake bioassay was used to assess apoptosis in ARVMs infected with control (LacZ),  $\alpha 5\beta 1D$  integrin and  $\alpha 7\beta 1D$  integrin recombinant adenoviruses, and then subjected to hypoxia / reoxygenation. There were no significant differences between groups.

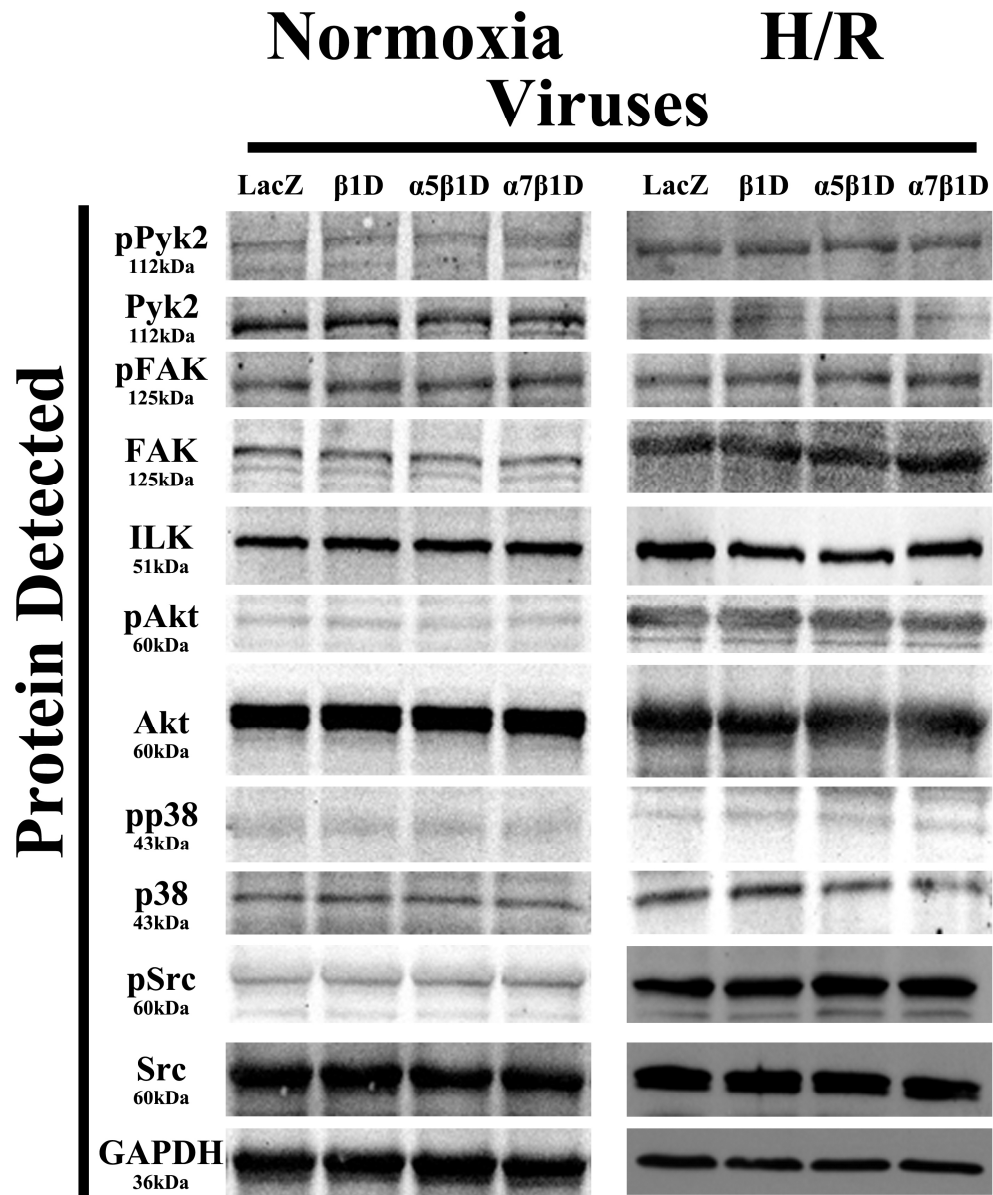

**FIGURE S4 - Representative western blot analyses of integrin-related signaling molecules in control cells and ones with integrin overexpression, during normoxia and following H/R. (n = 8 each group.)** ILK and all ‘total’ forms of the various other proteins were first normalized to GAPDH as an internal loading control. Then, phosphorylated forms of Pyk2, FAK, Akt, p38 and Src were normalized to the total protein / GAPDH of each respective phospho-protein. There were no significant differences between groups when analyzed by densitometry (Densitometric data not shown).

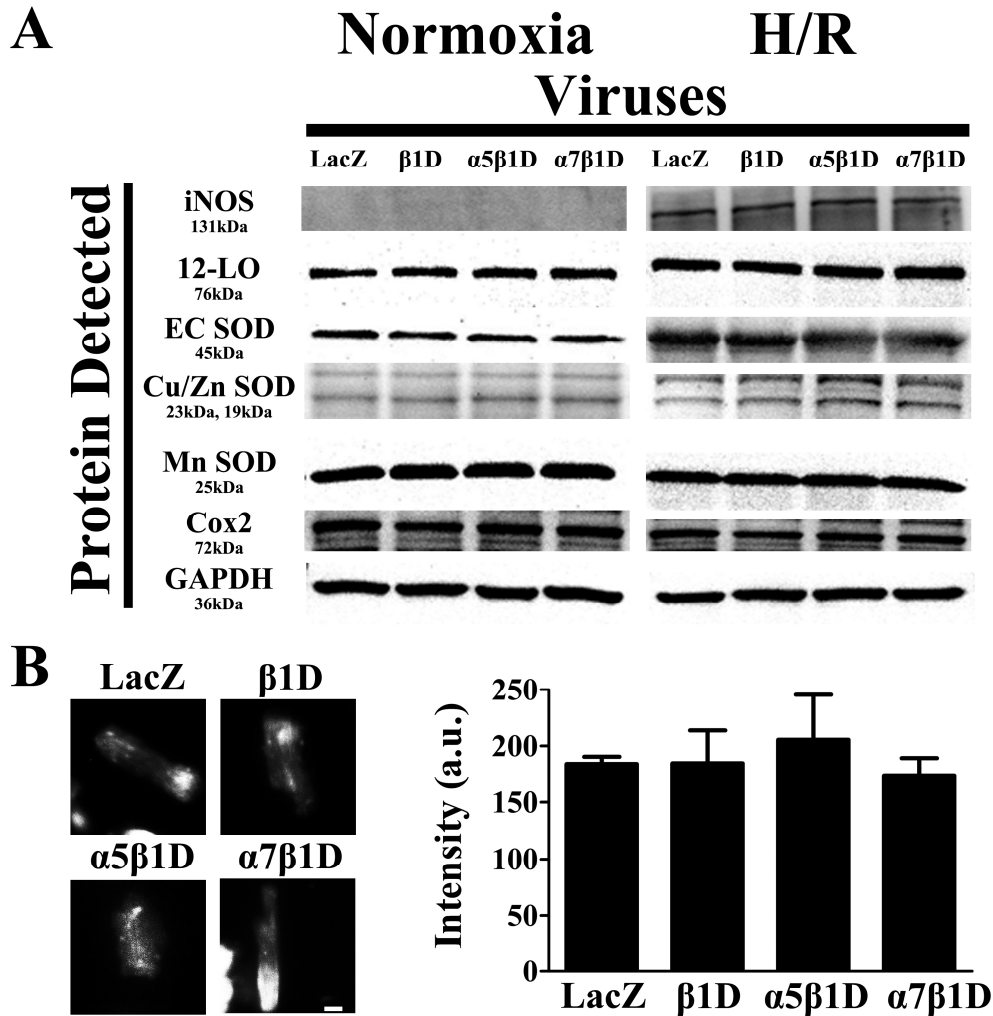

**FIGURE S5 – Analysis of oxidative stress-related proteins and superoxide anions in cardiomyocytes subjected to H/R.**

(A) Representative western blot analyses for oxidative stress related proteins in the basal state (normoxic) and also following H/R. (n = 8 each group.) There were no significant differences between iNos, 12-LO, EC SOD, Cu/Zn SOD, Mn SOD and Cox2, between groups (Densitometric data not shown).

(B) Left - Representative fluorescent photomicrographs of virally infected ARVMs probed for superoxide anions with dihydroethidium (HE) following H/R. Bar. 20um. Right - Densitometric quantification of superoxide anions in virally infected cells. There were no significant differences between groups.

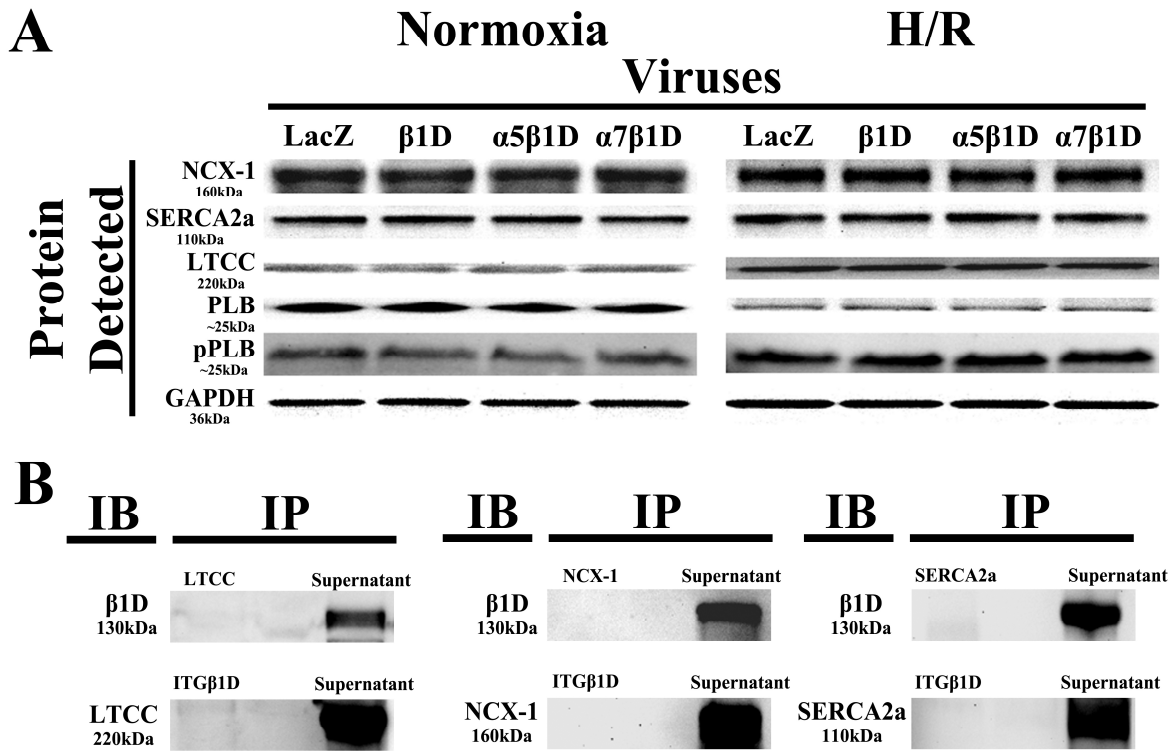

**Figure S6 – Integrin overexpression does not modulate expression or interaction with several key myocyte Ca<sup>2+</sup> handling proteins, nor cause changes in phospholamban phosphorylation.**

(A) Western blot analyses shows that overexpression of integrins in cardiomyocytes during normoxia or H/R does not change expression of key Ca<sup>2+</sup> regulatory proteins (NCX1, SERCA2A, LTCC, PLB) nor modulate PLB phosphorylation. (n = 8 each group.) There were no significant differences between groups.

(B) Integrin overexpression did not alter interactions between β1D integrin and key Ca<sup>2+</sup> handling proteins in ARVMs. Protein extracts were immunoprecipitated using anti-β1D integrin and anti-LTCC antibodies (left panels), anti-β1D integrin and anti-NCX-1 (middle panel) or anti-β1D integrin and anti-SERCA2a antibodies (right panel). IgG was used as a negative control, Evaluation of protein expression in supernatant of IP buffer served as positive controls. β1D integrin did not immunoprecipitate with any of these proteins.

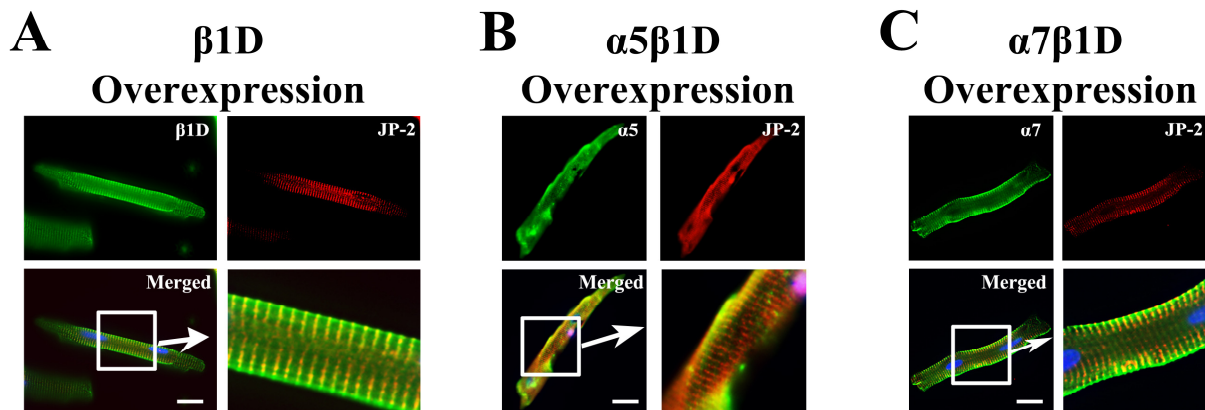

**Figure S7 – T-tubule expression of integrins in cardiomyocytes.**

Immunofluorescent microscopy shows that with overexpression of integrin  $\beta$ 1D (Panel A),  $\alpha$ 5 (Panel B) or  $\alpha$ 7 (Panel C) all co-localize in T-tubules in cardiomyocytes. Integrin localization (Green) can be compared with the T-tubule marker, Junctophilin-2 (Red). Nuclei were stained with DAPI (blue). Bars = 20um

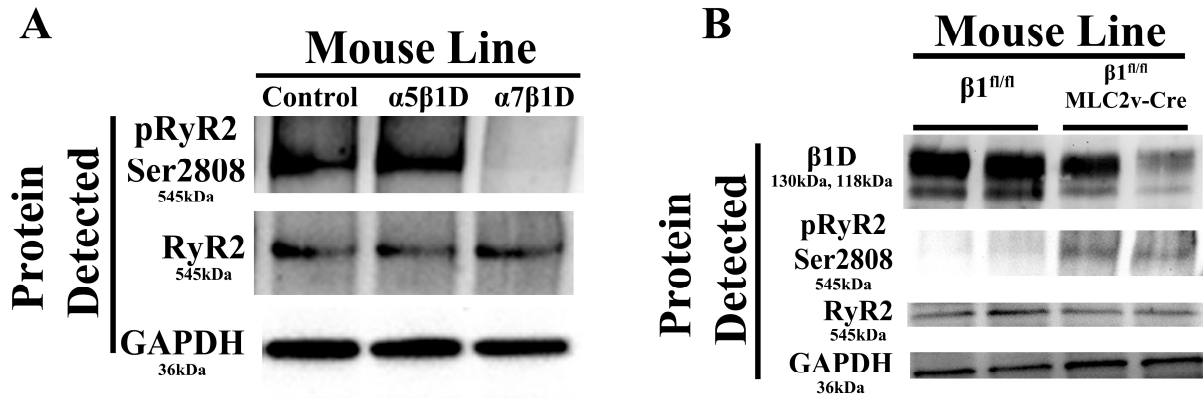

**Figure S8: RyR phosphorylation *in vivo*.**

Representative Western blot analyses of RyR2 Ser 2808 phosphorylation level in:

(A) Cardiac myocyte-specific  $\alpha 5$ ,  $\alpha 7$  or  $\beta 1D$  integrin Tg mice and littermate controls,

(B) Cardiomyocyte-specific  $\beta 1$  integrin KO mice and littermate controls. RyR2 Ser-2808 phosphorylation was decreased in  $\alpha 7\beta 1D$  Tg mice compared with control wild-type or  $\alpha 5\beta 1D$  Tg mice, while RyR2 Ser-2808 phosphorylation was increased in  $\beta 1$  integrin deficient mice.

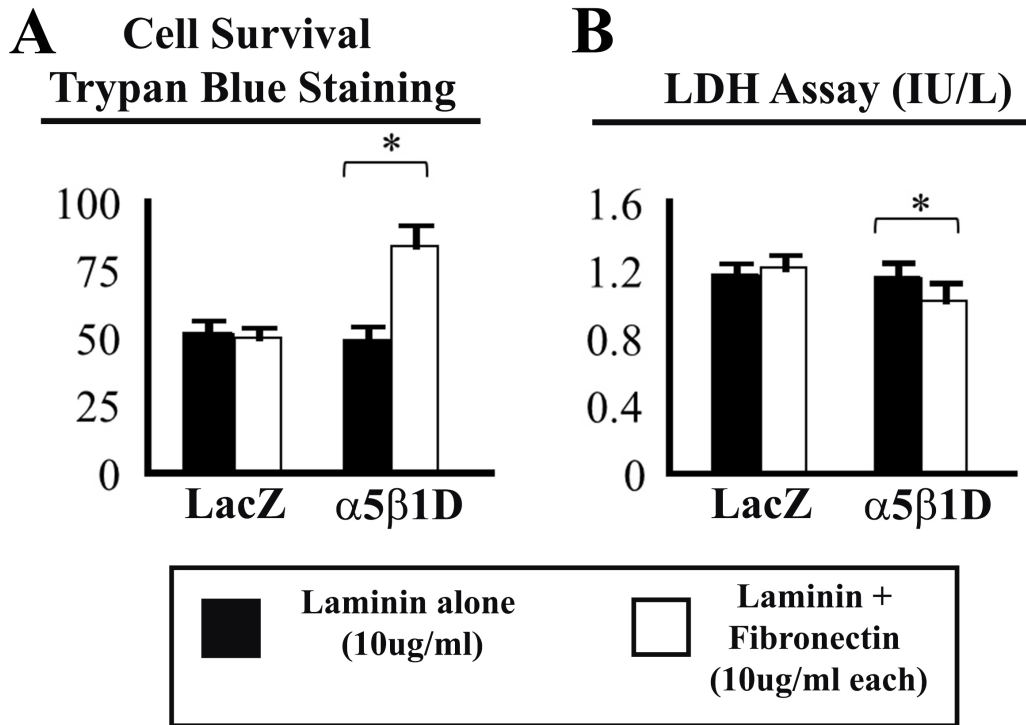

**Figure S9 - Integrin  $\alpha 5\beta 1D$  improved cell survival of cardiomyocytes when bound to ECM ligand.**

Overexpression of integrin  $\alpha 5\beta 1D$  improved cell survival of cardiomyocytes only when cells were plated on an extracellular matrix ligand (fibronectin) that could bind this integrin receptor. Thus, no improvement in survival was noted when the cells were plated only on laminin, but only when  $\alpha 5\beta 1D$  cells were attached to a mixture of laminin and fibronectin was survival improved.

(A) Survival rate of cells assayed by Trypan-blue staining after H/R injury.

(B) Cell survival evaluated by LDH release after H/R. \* $P < 0.05$  vs.  $\alpha 5\beta 1D$  on dish coated only with laminin (One-way ANOVA).

| Fragment | Primer Sequence                                                                             |
|----------|---------------------------------------------------------------------------------------------|
| 1        | F 5' CGAATTCGCCACCATGGCTGATGCGGGCGAAG 3'<br>R 5' CGTCGACCTACAGGATGGATTCCAAGACTCTC 3'        |
| 2        | F 5' CGGATCCGTGCCACCATGTGCATCGACCGCCTGCATG 3'<br>R 5' CGTCGACCTATTCTTGTAAGCCACAGATGG 3'     |
| 3        | F 5' CGAATTCGCCACCATGGAAAATGCTCACAATGTGTGG 3'<br>R 5' CGTCGACCTATTCGTTGTTTCATCATGAGCCTGG 3' |
| 4        | F 5' CGAATTCGCCACCATGTTCATCGTCCCTATGACAGAGG 3'<br>R 5' CGTCGACCTATGAAGCTGCGGCCACGTCT 3'     |
| 5        | F 5' CGAATTCGCCACCATGGGTCAACTCCTTTAGACGTGG 3'<br>R 5' CGTCGACCTAAAAGTTCCTTCAGAATCCATGG 3'   |
| 6        | F 5' CGAATTCGCCACCATGCATGCAAAGATGCCTCTGAAG 3'<br>R 5' CGTCGACCTACAAATCCTCTGCAGCATTGTC 3'    |
| 7        | F 5' CGGATCCGCCACCATGGAGATGGTGACAAGCCTGTTC 3'<br>R 5' CGTCGACCTAAATAAGTTGATGGAGGGGATCAAC 3' |

**SUPPLEMENTAL TABLE 1: Primers used for construction of RyR2 fragments**



### **SUPPLEMENTAL REFERENCES**

1. Ross, R.S., Pham, C., Shai, S.Y., Goldhaber, J.I., Fenczik, C., Glembotski, C.C., Ginsberg, M.H., and Loftus, J.C. 1998. Beta1 integrins participate in the hypertrophic response of rat ventricular myocytes. *Circ Res* 82:1160-1172.
2. Pham, C.G., Harpf, A.E., Keller, R.S., Vu, H.T., Shai, S.Y., Loftus, J.C., and Ross, R.S. 2000. Striated muscle-specific beta(1D)-integrin and FAK are involved in cardiac myocyte hypertrophic response pathway. *Am J Physiol Heart Circ Physiol* 279:H2916-2926.
3. Nesbit, M., Schaider, H., Berking, C., Shih, D.T., Hsu, M.Y., McBrian, M., Crombleholme, T.M., Elenitsas, R., Buck, C., and Herlyn, M. 2001. Alpha5 and alpha2 integrin gene transfers mimic the PDGF-B-induced transformed phenotype of fibroblasts in human skin. *Lab Invest* 81:1263-1274.
4. Zemljic-Harpf, A.E., Ponrartana, S., Avalos, R.T., Jordan, M.C., Roos, K.P., Dalton, N.D., Phan, V.Q., Adamson, E.D., and Ross, R.S. 2004. Heterozygous inactivation of the vinculin gene predisposes to stress-induced cardiomyopathy. *Am J Pathol* 165:1033-1044.
5. Valencik, M.L., Zhang, D., Punske, B., Hu, P., McDonald, J.A., and Litwin, S.E. 2006. Integrin activation in the heart: a link between electrical and contractile dysfunction? *Circ Res* 99:1403-1410.
6. Song, W.K., Wang, W., Foster, R.F., Bielser, D.A., and Kaufman, S.J. 1992. H36-alpha 7 is a novel integrin alpha chain that is developmentally regulated during skeletal myogenesis. *J Cell Biol* 117:643-657.
7. Alto, N.M., Soderling, S.H., Hoshi, N., Langeberg, L.K., Fayos, R., Jennings, P.A., and Scott, J.D. 2003. Bioinformatic design of A-kinase anchoring protein-in silico: a potent and selective peptide antagonist of type II protein kinase A anchoring. *Proc Natl Acad Sci U S A* 100:4445-4450.
8. Burns-Hamuro, L.L., Ma, Y., Kammerer, S., Reineke, U., Self, C., Cook, C., Olson, G.L., Cantor, C.R., Braun, A., and Taylor, S.S. 2003. Designing isoform-specific peptide disruptors of protein kinase A localization. *Proc Natl Acad Sci U S A* 100:4072-4077.
9. Hundsrucker, C., Krause, G., Beyermann, M., Prinz, A., Zimmermann, B., Diekmann, O., Lorenz, D., Stefan, E., Nedvetsky, P., Dathe, M., et al. 2006. High-affinity AKAP7delta-protein kinase A interaction yields novel protein kinase A-anchoring disruptor peptides. *Biochem J* 396:297-306.
10. Liu, Z., Wang, R., Tian, X., Zhong, X., Gangopadhyay, J., Cole, R., Ikemoto, N., Chen, S.R., and Wagenknecht, T. 2010. Dynamic, inter-subunit interactions between the N-terminal and central mutation regions of cardiac ryanodine receptor. *J Cell Sci* 123:1775-1784.
